# Supplementary material for: Emergency care provided to refugee children in Europe: RefuNET: a cross-sectional survey study
Source: PubMed Central journal article supplement — Emerg Med J. 2020 Sep 9;38(1):5–13. doi: 10.1136/emermed-2019-208699 (PMC7788210; doi:10.1136/emermed-2019-208699), 2020-09-09
Supplement: emermed-2019-208699supp001.pdf [file emermed-2019-208699supp001.pdf]

## Appendix 1. Search strategy and results

A total of 20 published resources were collated to guide physicians in dealing with refugee children in urgent and emergency care.

Firstly, our systematic search identified 9 relevant publications; These covered 1) infection disease screening and guidance on immunisations<sup>1</sup>, 2) general health assessments<sup>2,3</sup>, 3) access to (mental) health services<sup>4</sup>, 4) health policies<sup>5</sup>, 5) development of guidelines<sup>6</sup>, 6) overview of health profiles<sup>7</sup>, 7) mental health assessments<sup>8</sup>.

Secondly, searching websites of national societies yielded another 5 guidelines, from Denmark, Germany, The Netherlands, Spain, and the United Kingdom.<sup>9-13</sup> These generally discussed broad initial health assessments (UK, The Netherlands, Denmark), or focussed more specifically on immunisations (Spain) or infection screening (Germany).

In addition, six unique documents were uploaded by 13 different survey respondents (one also identified by our search), detailing 1) immunisations in Germany (n=1)<sup>14</sup>, Switzerland (n=1)<sup>15</sup> and Spain (n=1)<sup>16</sup>; 2) ID screening in Germany (n=1)<sup>17</sup> and Switzerland (n=1)<sup>15</sup>; 3) healthcare pathways for unaccompanied asylum seeking children in North London (unpublished document), UK; 4) safeguarding recommendations in Sussex, UK (unpublished document).

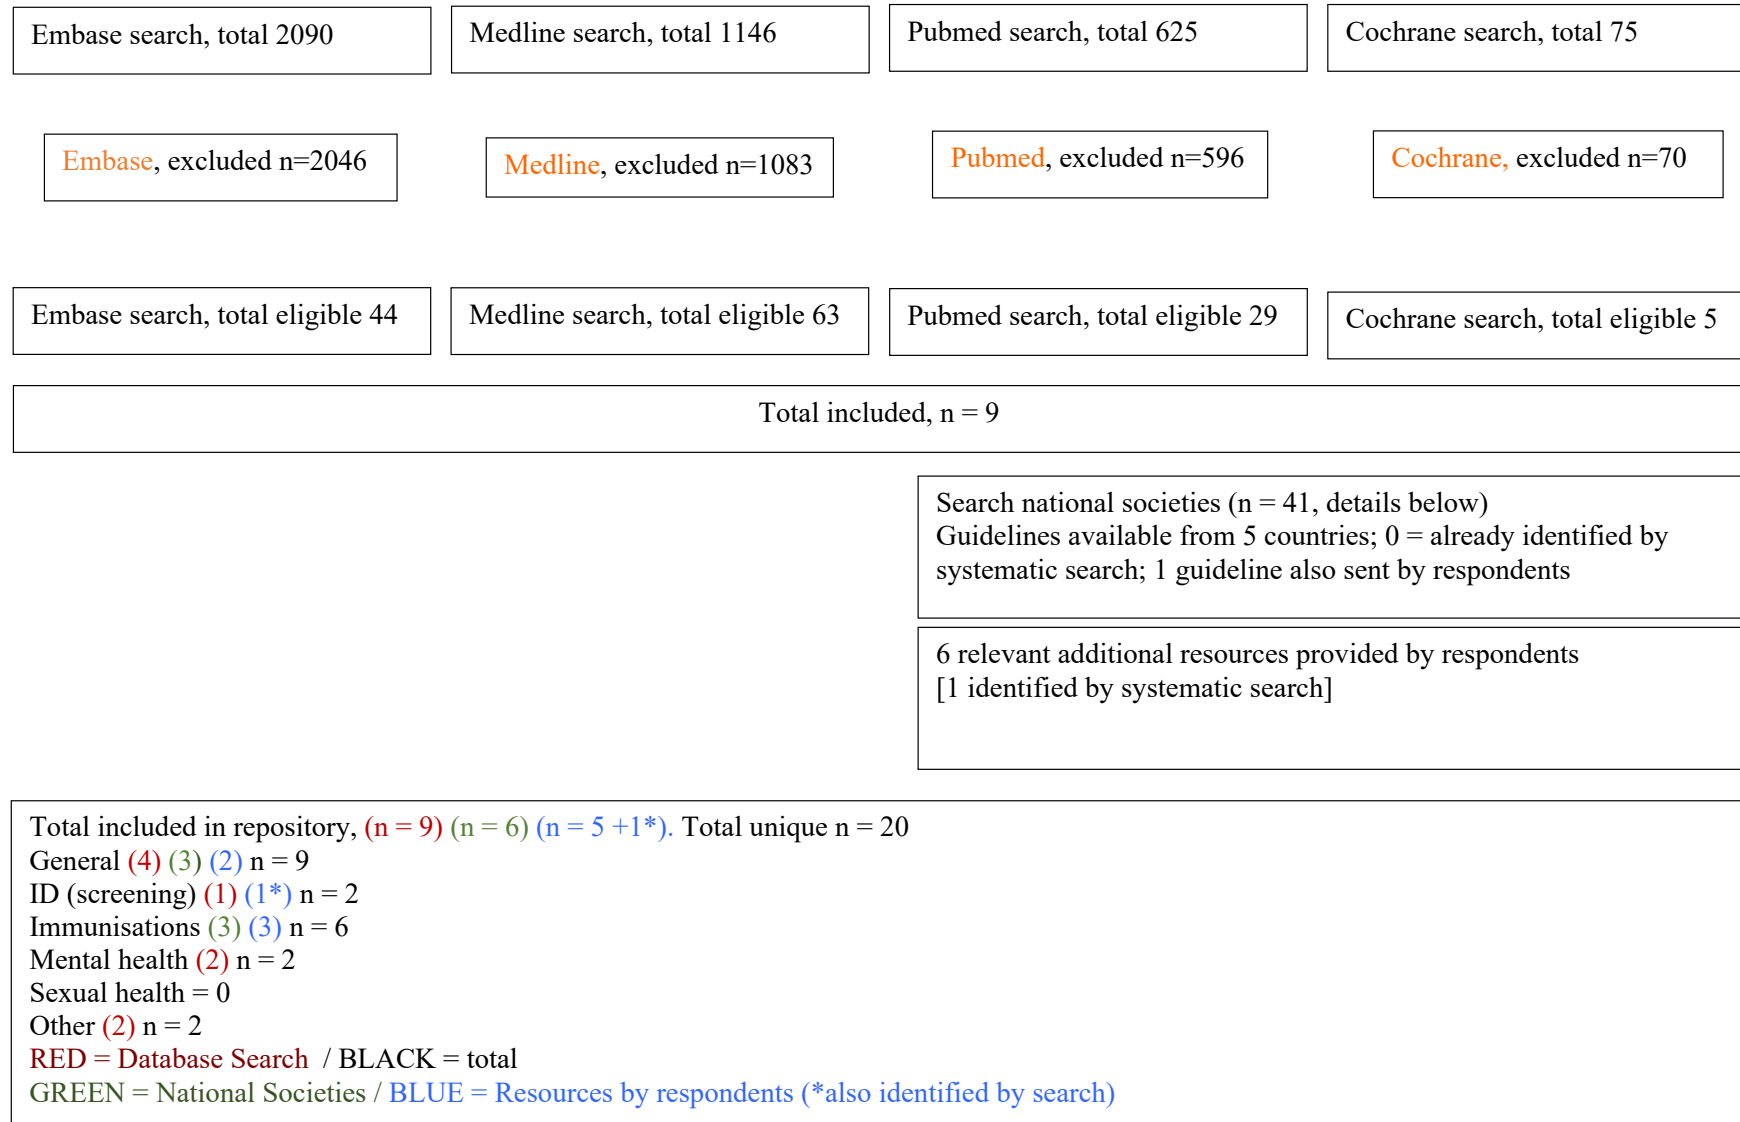

### Search Embase (OVID)

Embase 2090 Hits with 44 eligible for further re-evaluation. 4 guidelines included.

### Results (4):

- 1) (Europe) (mental health) <sup>8</sup>
- 2) (general/other) <sup>5</sup>
- 3) (general) <sup>3</sup>
- 4) (ID) <sup>17</sup>

### References

3. Jansson P. [Treatment of asylum seeking children]. *Ugeskr Laeger*. 2010;172(7):563; author reply 563.
5. Hjern A, Østergaard LS, Norredam M, de Luna CM-M, Goldfeld S. Health policies for migrant children in Europe and Australia. *Lancet*. 2017;389(10066):249. doi:10.1016/s0140-6736(17)30084-3
8. Hebebrand J, Anagnostopoulos D, Eliez S, Linse H, Pejovic-Milovancevic M, Klasen H. A first assessment of the needs of young refugees arriving in Europe: what mental health professionals need to know. *Eur Child Adolesc Psychiatry*. 2016;25(1):1-6. doi:10.1007/s00787-015-0807-0
17. Pfeil J, Kobbe R, Trapp S, Kitz C, Hufnagel M. [Recommendations for the diagnosis and prevention of infectious diseases in pediatric and adolescent refugees in Germany : Statement of the German Society of Pediatric Infectious Diseases, the Society of Tropical Pediatrics and International Child Health,. *Internist (Berl)*. 2016;57(5):416-433. doi:10.1007/s00108-016-0040-z

### Search strategy

Embase (1974 to Feb 16) last performed on April 7<sup>th</sup> 2018

|   |                            |         |
|---|----------------------------|---------|
| 1 | Exp child/                 | 1902938 |
| 2 | child/                     | 1245301 |
| 3 | infant/                    | 437336  |
| 4 | exp toddler/               | 3364    |
| 5 | newborn/                   | 374900  |
| 6 | exp juvenile/              | 2542617 |
| 7 | exp <b>minor(person)*/</b> | 473     |
| 8 | adolescent/                | 1190802 |
| 9 | exp toddler/               | 3364    |

|    |                                           |         |
|----|-------------------------------------------|---------|
| 10 | exp refugee/                              | 9675    |
| 11 | exp migrant/                              | 27926   |
| 12 | exp asylum seeker/                        | 498     |
| 13 | exp Europe/                               | 1242031 |
| 14 | limit 12 yrs -2000- Current               | 984160  |
| 15 | 1 or 2 or 3 or 4 or 5 or 6 or 7 or 8 Or 9 | 2542870 |
| 16 | 10 or 11 or 12                            | 27926   |
| 17 | 15 and 16                                 | 7100    |
| 18 | 13 and 17                                 | 2350    |
| 19 | 14 and 18                                 | 2090    |

### Search MedLine

MedLine1146 Hits with 63 eligible for further re-evaluation. 0 guidelines included.

No guidelines on refugee child health in emergency care identified.

### Search strategy

Ovid MEDLINE(R) Epub Ahead of Print, In-Process & Other Non-Indexed Citations, Ovid MEDLINE(R) Daily, Ovid MEDLINE and Versions(R) 1946 to February 14, 2018 (last performed on April 7<sup>th</sup> 2018).

|   |                                                                                                                                                                                                                                                                                                                                                                                                                                                                                         |         |
|---|-----------------------------------------------------------------------------------------------------------------------------------------------------------------------------------------------------------------------------------------------------------------------------------------------------------------------------------------------------------------------------------------------------------------------------------------------------------------------------------------|---------|
| 1 | Exp Fever/dh, dt rh, th (Diet Therapy, Drug Therapy, Rehabilitation, Therapy-Specific Subheadings have been included)                                                                                                                                                                                                                                                                                                                                                                   | 5610    |
| 2 | (fever* or hyperthermia* or pyrexia* or febrile or (sweating adj 1 sickness) or (sudor anglicus or temperature increase* or temperature elevat* or increased body temperature above normal or raised temperature* temperature raised or high body temperature*) mp. (mp=title, abstract, original title, name of substance word, subject heading word, keeyword heading word, prtocol suplementary concept word, rare disease supplementary concept word, unique idenitfier, synomymys) | 255985  |
| 3 | Exp Therapeutics/ or exp Rehabilitation/ or exp disease management/ or exp Medication Therapy Management/ or Case Management/ or (therap* or treat* or rehab*). Mp. (mp=title, abstract, original title, name of subsatnce word, subject                                                                                                                                                                                                                                                | 8679995 |

|    |                                                                                                                                                                                                                                                                                                                                                                                                              |         |
|----|--------------------------------------------------------------------------------------------------------------------------------------------------------------------------------------------------------------------------------------------------------------------------------------------------------------------------------------------------------------------------------------------------------------|---------|
|    | heading word, keyword heading word, protocol supplementary concept word, rare disease supplementary concept word, unique identifier, synonymys)                                                                                                                                                                                                                                                              |         |
| 4  | 2 and 3                                                                                                                                                                                                                                                                                                                                                                                                      | 125342  |
| 5  | 1 or 4                                                                                                                                                                                                                                                                                                                                                                                                       | 126773  |
| 6  | Adolescent/ ore exp child/ or exp infant/ or (child* or pead* or neonate* or baby or babies or infant? Or adolescent? Or toddler?) mp. (mp=title, abstract, original title, name of substance word, subject heading word, keyword heading word, protocol supplementary concept word, rare disease supplementary concept word, unique identifier, synonymys)                                                  | 3429855 |
| 7  | 5 and 6                                                                                                                                                                                                                                                                                                                                                                                                      | 32461   |
| 8  | Guideline/ or Practice Guideline/ or Practice Guideline as Topic/ Guideline Adherence/                                                                                                                                                                                                                                                                                                                       | 148698  |
| 9  | ((Guideline* or pathway* or protocol* or algorithm* or polic* or standard* or recommendation* or guidance*) adj2 (clinical or treatment* or diagnos* or management or antibiotic*)) mp. (mp=title, abstract, original title, name of substance word, subject heading word, keyword heading word, protocol supplementary concept word, rare disease supplementary concept word, unique identifier, synonymys) | 207478  |
| 10 | 8 or 9                                                                                                                                                                                                                                                                                                                                                                                                       | 329613  |
| 11 | 7 and 10                                                                                                                                                                                                                                                                                                                                                                                                     | 1427    |
| 12 | Limit 11 to yr="2000-Current"                                                                                                                                                                                                                                                                                                                                                                                | 1146    |

### Search Pubmed

Pubmed625 Hits with 29 eligible for further re-evaluation. 7 guidelines included.

### Results (7)

- 1) \*not true guideline or care recommendations (other) <sup>1</sup>
- 2) (Europe and Australia) Review of guidelines (mental health) <sup>4</sup>
- 3) (US) (general) <sup>2</sup>
- 4) (already in Embase; nr 2 above) (general/other) <sup>5</sup>
- 5) (already in Embase; nr 4 above) (ID) <sup>17</sup>
- 6) (Canada) (general) <sup>6</sup>

7) \*not true guideline or care recommendations (US) (other) <sup>7</sup>

#### References

1. Zeitlmann N, George M, Falkenhorst G. Polioimpfung und Stuhlscreening in deutschen Erstaufnahmeeinrichtungen für Asylsuchende, November 2013–Januar 2014. *Bundesgesundheitsblatt - Gesundheitsforsch - Gesundheitsschutz*. 2016;59(5):584-591. doi:10.1007/s00103-016-2334-7
2. Dicker S, Stauffer WM, Mamo B, Nelson C, O'Fallon A. Initial refugee health assessments. New recommendations for Minnesota. *Minn Med*. 2010;93(4):45-48.
4. Thomson MS, Chaze F, George U, Guruge S. Improving Immigrant Populations' Access to Mental Health Services in Canada: A Review of Barriers and Recommendations. *J Immigr Minor Heal*. 2015;17(6):1895-1905. doi:10.1007/s10903-015-0175-3
5. Hjern A, Østergaard LS, Norredam M, de Luna CM-M, Goldfeld S. Health policies for migrant children in Europe and Australia. *Lancet*. 2017;389(10066):249. doi:10.1016/s0140-6736(17)30084-3
6. Swinkels H, Pottie K, Tugwell P, Rashid M, Narasiah L. Development of guidelines for recently arrived immigrants and refugees to Canada: Delphi consensus on selecting preventable and treatable conditions. *CMAJ*. 2011;183(12):E928-32. doi:10.1503/cmaj.090290
7. Yun K, Matheson J, Payton C, et al. Health Profiles of Newly Arrived Refugee Children in the United States, 2006-2012. *Am J Public Health*. 2016;106(1):128-135. doi:10.2105/AJPH.2015.302873
17. Pfeil J, Kobbe R, Trapp S, Kitz C, Hufnagel M. [Recommendations for the diagnosis and prevention of infectious diseases in pediatric and adolescent refugees in Germany : Statement of the German Society of Pediatric Infectious Diseases, the Society of Tropical Pediatrics and International Child Health,. *Internist (Berl)*. 2016;57(5):416-433. doi:10.1007/s00108-016-0040-z

#### Search strategy

With all filters 144 hits.

All filters, but NOT „Europe“ 625 hits.

Out of this search 29 papers eligible for further evaluation.

Total included 7

|                                                                                                                                                                                                                                                                                            |     |
|--------------------------------------------------------------------------------------------------------------------------------------------------------------------------------------------------------------------------------------------------------------------------------------------|-----|
| ((((((((child(MeSH Terms))or child) or minor) or juvenile) or ifant) or newborn) or young)) AND (((refugee(MeSH Terms) OR refugee) or migrant) or asylum seeker) AND ((Europe(MeSH Terms)) Or Europe)) AND (((guideline) or pathway) or recommendation) or policy) or guideline(MeSHTerm)) | 625 |
|--------------------------------------------------------------------------------------------------------------------------------------------------------------------------------------------------------------------------------------------------------------------------------------------|-----|

#### Search Cochrane

Cochrane 75 Hits with 5 eligible for further re-evaluation. 0 guidelines included.

**Search strategy** (last performed on April 7<sup>th</sup> 2018)

|    |                                             |        |
|----|---------------------------------------------|--------|
| 1  | MeSH descriptor(child) explode all trees    | 296    |
| 2  | child                                       | 107224 |
| 3  | MeSH descriptor (Infant) explode all trees  | 15843  |
| 4  | newborn                                     | 23301  |
| 5  | minor                                       | 16065  |
| 6  | migrant                                     | 233    |
| 7  | refugee                                     | 193    |
| 8  | MeSh descriptor(refugee) explode all trees  | 95     |
| 9  | guideline                                   | 10414  |
| 10 | recommendation                              | 5511   |
| 11 | policy                                      | 12189  |
| 12 | MeSH descriptor(Guideine) explode all trees | 26     |
| 13 | #1 or #2 or #3 or #4 or #5                  | 132388 |
| 14 | #6 or #7 or #8                              | 443    |
| 15 | #9 or #10 or #11 or #12                     | 25921  |
| 16 | #13 and #14                                 | 195    |
| 17 | #16 and #15                                 | 75     |

## Search of paediatric national societies.

Last search performed October 1<sup>st</sup> 2018

| <b>Country</b>                                  | <b>National Society</b>                                                                     | <b>available through website</b>   | <b>guidelines</b> | <b>comments</b>                                                                                                                                                                                                               |
|-------------------------------------------------|---------------------------------------------------------------------------------------------|------------------------------------|-------------------|-------------------------------------------------------------------------------------------------------------------------------------------------------------------------------------------------------------------------------|
| Albania                                         | Albanian Pediatric Society                                                                  | www.aps.al                         | NO                |                                                                                                                                                                                                                               |
| Armenia                                         | Institute of Child and Adolescent Health;<br>Arabkir medical centre                         | www.arabkirjmc.am                  | NO                |                                                                                                                                                                                                                               |
| Austria                                         | Austrian Pediatric Society; Österreichische<br>Gesellschaft für Kinder- und Jugendheilkunde | www.paediatric.at                  | NO                |                                                                                                                                                                                                                               |
| Belgium                                         | Belgische Vereniging voor<br>Kindergeneeskunde                                              | www.bvksbp.be                      | NO                |                                                                                                                                                                                                                               |
| Bulgaria                                        | Bulgarian Pediatric Association                                                             | www.pediatrica-bg.eu               | NO                |                                                                                                                                                                                                                               |
| Croatia                                         | Croatian Pediatric Society                                                                  | www.hpd.com.hr                     | NO                |                                                                                                                                                                                                                               |
| Cyprus                                          | Cyprus Paediatric Society                                                                   | www.child.org.cy                   | NO                |                                                                                                                                                                                                                               |
| Czech Republic                                  | Czech Pediatric Society                                                                     | www.cpsjep.cz                      | NO                |                                                                                                                                                                                                                               |
| Denmark                                         | Dansk Paediatrik Selskab                                                                    | www.paediatric.dk                  | Yes               | <a href="https://www.sst.dk/da/sundhed-og-livsstil/migranter">https://www.sst.dk/da/sundhed-og-livsstil/migranter</a>                                                                                                         |
| Estonia                                         | Estonian Paediatric Association                                                             | www.elselts.ee                     | NO                |                                                                                                                                                                                                                               |
| Finland                                         | Finnish Paediatric Association                                                              | www.suomenlastenlaakariyhdistys.fi | NO                | summary of migrant children's legal rights                                                                                                                                                                                    |
| France                                          | French Society of Pediatrics ; Société<br>Française de Pédiatrie (SFP)                      | www.sfpediatric.com                | NO                |                                                                                                                                                                                                                               |
| The Former<br>Yugoslav Republic<br>of Macedonia | Pediatric Association of Macedonia                                                          | www.zpm.org.mk                     | NO                |                                                                                                                                                                                                                               |
| Georgia                                         | Georgian Pediatric Association                                                              | www.acadpediatr.ge                 | NO                |                                                                                                                                                                                                                               |
| Germany                                         | Deutsche Gesellschaft für Kinder- und<br>Jugendmedizin                                      | www.dgkj.de                        | Yes               | <a href="https://www.dgpi.de/go/wp-content/uploads/2015/10/Fluechtlinge_DGPI-GTP-BVKJ-Stellungnahme_V1.4_22Nov2015.pdf">dgpi.de/go/wp-content/uploads/2015/10/Fluechtlinge_DGPI-GTP-BVKJ-Stellungnahme_V1.4_22Nov2015.pdf</a> |
| Greece                                          | Hellenic Paediatric Society                                                                 | www.e-child.gr                     | NO                |                                                                                                                                                                                                                               |
| Hungary                                         | Hungarian Pediatric Association                                                             | www.gyermekorvostarsasag.hu        | NO                |                                                                                                                                                                                                                               |
| Ireland                                         | Royal College of Physician of Ireland                                                       | www.rcpi.ie                        | NO                | summary of migrant children's legal rights                                                                                                                                                                                    |



|                                          |                                               |                                                                                                                                                                            |     |                                                                                                                                                                                              |
|------------------------------------------|-----------------------------------------------|----------------------------------------------------------------------------------------------------------------------------------------------------------------------------|-----|----------------------------------------------------------------------------------------------------------------------------------------------------------------------------------------------|
| Israel                                   | Israel Pediatric Association                  | <a href="http://www.pediatrics.org.il">www.pediatrics.org.il</a>                                                                                                           | NO  |                                                                                                                                                                                              |
| Italy                                    | Societa Italiana Ricerca Pediatrica           | <a href="http://www.sirped.it">www.sirped.it</a>                                                                                                                           | NO  |                                                                                                                                                                                              |
| Lithuania                                | Lithuanian Paediatric Association             | <a href="http://www.pediatrija.org">www.pediatrija.org</a>                                                                                                                 | NO  |                                                                                                                                                                                              |
| Luxembourg                               | Societe Luxembourgeoise de Pediatrie          | <a href="http://sante.public.lu/fr/annuaire/s/societe-luxembourgeoise-pediatrie/index.html">sante.public.lu/fr/annuaire/s/societe-luxembourgeoise-pediatrie/index.html</a> | NO  |                                                                                                                                                                                              |
| Moldova                                  | Moldovan Pediatric Society                    | <a href="http://www.pediatru.md">www.pediatru.md</a>                                                                                                                       | NO  |                                                                                                                                                                                              |
| Montenegro                               | Montenegro Pediatric Association              | n/a                                                                                                                                                                        | NO  |                                                                                                                                                                                              |
| The Netherlands                          | Pediatric Association of the Netherlands      | <a href="http://www.nvk.nl">www.nvk.nl</a>                                                                                                                                 | Yes | <a href="http://www.tulipsforchildhealth.nl/activities/nvk-dutch-association-of-pediatrics-congress">www.tulipsforchildhealth.nl/activities/nvk-dutch-association-of-pediatrics-congress</a> |
| Poland                                   | Polish Pediatric Society                      | <a href="http://www.ptp.edu.pl">www.ptp.edu.pl</a>                                                                                                                         | NO  |                                                                                                                                                                                              |
| Portugal                                 | Portuguese Society of Pediatrics              | <a href="http://www.spp.pt">www.spp.pt</a>                                                                                                                                 | NO  |                                                                                                                                                                                              |
| Romania                                  | Romanian Society of Pediatrics                | <a href="http://www.srped.ro">www.srped.ro</a>                                                                                                                             | NO  |                                                                                                                                                                                              |
| Russia                                   | Russian Public Academy of Pediatrics          | <a href="http://www.pediatr-russia.ru/eng/">www.pediatr-russia.ru/eng/</a>                                                                                                 | NO  |                                                                                                                                                                                              |
| Serbia                                   | Paediatric Association of Serbia              | <a href="http://www.imd.org.rs/udruzenje-pedijatara">www.imd.org.rs/udruzenje-pedijatara</a>                                                                               | NO  |                                                                                                                                                                                              |
| Slovakia                                 | Slovakian Paediatric Society                  | <a href="http://www.sls-sps.sk">www.sls-sps.sk</a>                                                                                                                         | NO  |                                                                                                                                                                                              |
| Slovenia                                 | Slovenian Paediatric Society                  | <a href="http://www.zzp.si">www.zzp.si</a>                                                                                                                                 | NO  |                                                                                                                                                                                              |
| Spain                                    | Spanish Association of Pediatrics             | <a href="http://www.aeped.es">www.aeped.es</a>                                                                                                                             | Yes | <a href="https://vacunasaep.org/documentos/manual/cap-12">https://vacunasaep.org/documentos/manual/cap-12</a>                                                                                |
| Sweden                                   | Swedish Paediatric Society                    | <a href="http://www.blf.net">www.blf.net</a>                                                                                                                               | NO  |                                                                                                                                                                                              |
| Turkey                                   | Turkish Pediatric Association                 | <a href="http://www.turkpediatri.org.tr">www.turkpediatri.org.tr</a>                                                                                                       | NO  |                                                                                                                                                                                              |
| United Kingdom                           | Royal College of Paediatrics and Child Health | <a href="http://www.rcpch.ac.uk">www.rcpch.ac.uk</a>                                                                                                                       | Yes |                                                                                                                                                                                              |
| <i>Non_european countries (selected)</i> |                                               |                                                                                                                                                                            |     |                                                                                                                                                                                              |
| Canada                                   | Canadian paediatric society                   | <a href="http://www.cps.ca">www.cps.ca</a>                                                                                                                                 | Yes | <a href="https://www.enfantsneocanadiens.ca/e-checklist">https://www.enfantsneocanadiens.ca/e-checklist</a>                                                                                  |

## Included resources:

9–13

9. Nederlandse Vereniging voor Kindergeneeskunde [Dutch Society of Paediatrics]: Dossier Kinderen van Vluchtelingen. <https://www.nvk.nl/Nieuws/Dossiers/Dossier-Kinderen-van-vluchtelingen>. Accessed January 18, 2019.
10. Royal College of Paediatrics and Child Health: Refugee and unaccompanied asylum-seeking children and young people. <https://www.rcpch.ac.uk/resources/refugee-unaccompanied-asylum-seeking-children-young-people>. Accessed January 18, 2019.
11. Sundhedsstyrelsen: Migranternes sundhed. <https://www.sst.dk/da/sundhed-og-livsstil/migranter>. Accessed January 18, 2019.
12. Empfehlungen zur infektiologischen Versorgung von Flüchtlingen im Kindes- und Jugendalter in Deutschland. Krankenhaus-Hygiene +

- Infektionsverhütung. doi:10.1016/j.khinf.2015.12.008
13. Comité Asesor de Vacunas de la Asociación Española de Pediatría. Sección III. Inmunización en circunstancias especiales: 12. VACUNACIÓN DE NIÑOS INMIGRANTES, REFUGIADOS Y ADOPTADOS. Manual de vacunas en línea de la AEP [Internet]. Madrid. <https://vacunasaep.org/documentos/manual/cap-12>. Published 2018. Accessed March 1, 2019.

### Documents provided by respondents:

Six unique documents were uploaded by 13 different survey respondents (one also identified by our search), detailing 1) immunisations in Germany (n=1)<sup>14</sup>, Switzerland (n=1)<sup>15</sup> and Spain (n=1)<sup>16</sup>; 2) ID screening in Germany (n=1)<sup>17</sup> and Switzerland (n=1)<sup>15</sup>; 3) healthcare pathways for refugee children (/unaccompanied asylum seeking children) in North London (unreferenced), UK; 4) safeguarding recommendations in Sussex, UK (unreferenced).

14. Koch-Institut R. Konzept zur Umsetzung frühzeitiger Impfungen bei Asylsuchenden nach Ankunft in Deutschland. 2015. doi:10.17886/EpiBull-2015-011
15. Bernhard S, Büttcher M, Heininger U, et al. Guidance for testing and preventing infections and updating immunisations in asymptomatic refugee children and adolescents in Switzerland. *Paediatr Conf Proc*. 2016;27:1-8.
16. Cilleruelo Ortega MJ, García Sánchez N. acunación en niños adoptados, inmigrantes y refugiados. Vacunación de niños viajeros. *Pediatr Integr*. 2015;XIX(10):702.e1-702.e10.
17. Pfeil J, Kobbe R, Trapp S, Kitz C, Hufnagel M. [Recommendations for the diagnosis and prevention of infectious diseases in pediatric and adolescent refugees in Germany : Statement of the German Society of Pediatric Infectious Diseases, the Society of Tropical Pediatrics and International Child Health, . *Internist (Berl)*. 2016;57(5):416-433. doi:10.1007/s00108-016-0040-z

## References

1. Zeitlmann N, George M, Falkenhorst G. Polioimpfung und Stuhlscreening in deutschen Erstaufnahmeeinrichtungen für Asylsuchende, November 2013–Januar 2014. *Bundesgesundheitsblatt - Gesundheitsforsch - Gesundheitsschutz*. 2016;59(5):584-591. doi:10.1007/s00103-016-2334-7
2. Dicker S, Stauffer WM, Mamo B, Nelson C, O'Fallon A. Initial refugee health assessments. New recommendations for Minnesota. *Minn Med*. 2010;93(4):45-48.
3. Jansson P. [Treatment of asylum seeking children]. *Ugeskr Laeger*. 2010;172(7):563; author reply 563.
4. Thomson MS, Chaze F, George U, Guruge S. Improving Immigrant Populations' Access to Mental Health Services in Canada: A Review of Barriers and Recommendations. *J Immigr Minor Heal*. 2015;17(6):1895-1905. doi:10.1007/s10903-015-0175-3
5. Hjern A, Østergaard LS, Norredam M, de Luna CM-M, Goldfeld S. Health policies for migrant children in Europe and Australia. *Lancet*. 2017;389(10066):249. doi:10.1016/s0140-6736(17)30084-3
6. Swinkels H, Pottie K, Tugwell P, Rashid M, Narasiah L. Development of guidelines for recently arrived immigrants and refugees to Canada: Delphi consensus on selecting preventable and treatable conditions. *CMAJ*. 2011;183(12):E928-32. doi:10.1503/cmaj.090290
7. Yun K, Matheson J, Payton C, et al. Health Profiles of Newly Arrived Refugee Children in the United States, 2006-2012. *Am J Public Health*. 2016;106(1):128-135. doi:10.2105/AJPH.2015.302873
8. Hebebrand J, Anagnostopoulos D, Eliez S, Linse H, Pejovic-Milovancevic M, Klasen H. A first assessment of the needs of young refugees arriving in Europe: what mental health professionals need to know. *Eur Child Adolesc Psychiatry*. 2016;25(1):1-6. doi:10.1007/s00787-015-0807-0
9. Nederlandse Vereniging voor Kindergeneeskunde [Dutch Society of Paediatrics]: Dossier Kinderen van Vluchtelingen. <https://www.nvk.nl/Nieuws/Dossiers/Dossier-Kinderen-van-vluchtelingen>. Accessed January 18, 2019.
10. Royal College of Paediatrics and Child Health: Refugee and unaccompanied asylum seeking children and young people. <https://www.rcpch.ac.uk/resources/refugee-unaccompanied-asylum-seeking-children-young-people>. Accessed January 18, 2019.
11. Sundhedsstyrelsen: Migranternes sundhed. <https://www.sst.dk/da/sundhed-og-livsstil/migranter>. Accessed January 18, 2019.
12. Empfehlungen zur infektiologischen Versorgung von Flüchtlingen im Kindes- und Jugendalter in Deutschland. Krankenhaus-Hygiene + Infektionsverhütung. doi:10.1016/j.khinf.2015.12.008
13. Comité Asesor de Vacunas de la Asociación Española de Pediatría. Sección III. Inmunización en circunstancias especiales: 12. VACUNACIÓN DE NIÑOS INMIGRANTES, REFUGIADOS Y ADOPTADOS. Manual de vacunas en línea de la AEP [Internet]. Madrid. <https://vacunasaep.org/documentos/manual/cap-12>. Published 2018. Accessed March 1, 2019.
14. Koch-Institut R. Konzept zur Umsetzung frühzeitiger Impfungen bei Asylsuchenden nach Ankunft in Deutschland. 2015. doi:10.17886/EpiBull-2015-011
15. Bernhard S, Büttcher M, Heininger U, et al. Guidance for testing and preventing infections and updating immunisations in asymptomatic refugee children and adolescents in Switzerland. *Paediatr Conf Proc*. 2016;27:1-8.
16. Cilleruelo Ortega MJ, García Sánchez N. vacunación en niños adoptados, inmigrantes y refugiados. Vacunación de niños viajeros. *Pediatr Integr*. 2015;XIX(10):702.e1-702.e10.
17. Pfeil J, Kobbe R, Trapp S, Kitz C, Hufnagel M. [Recommendations for the diagnosis and prevention of infectious diseases in pediatric and adolescent refugees in Germany : Statement of the German Society of Pediatric Infectious Diseases, the Society of Tropical Pediatrics and International Child Health, . *Internist (Berl)*. 2016;57(5):416-433. doi:10.1007/s00108-016-0040-z
