# Supplementary material for: Emergency care provided to refugee children in Europe: RefuNET: a cross-sectional survey study
Source: PubMed Central journal article supplement — Emerg Med J. 2020 Sep 9;38(1):5–13. doi: 10.1136/emermed-2019-208699 (PMC7788210; doi:10.1136/emermed-2019-208699), 2020-09-09
Supplement: emermed-2019-208699supp003.pdf [file emermed-2019-208699supp003.pdf]

Appendix 3. Data for graphs in figure 2, 3, 4

Appendix table 3.1. Data for figure 2: Statements on needs for providing urgent and emergency care to refugee children and young people in hospitals

|                                                                                        | completely disagree | disagree | neither agree or disagree | agree | completely agree | don't know | total |   |
|----------------------------------------------------------------------------------------|---------------------|----------|---------------------------|-------|------------------|------------|-------|---|
| we are well prepared for dealing with refugee children with acute health care problems | 6                   | 30       | 31                        | 33    | 7                | 1          | 108   | N |
|                                                                                        | 5.6                 | 27.8     | 28.7                      | 30.6  | 6.5              | 0.9        |       | % |
| there is clear guidance on dealing with refugee children                               | 18                  | 56       | 18                        | 13    | 2                | 1          | 108   | N |
|                                                                                        | 16.7                | 51.9     | 16.7                      | 12    | 1.9              | 0.9        |       | % |
| there is a need for a clinical guideline for dealing with refugee children             | 2                   | 8        | 21                        | 48    | 29               |            | 108   | N |
|                                                                                        | 1.9                 | 7.4      | 19.4                      | 44.4  | 26.9             |            |       | % |
| a clear policy for infection screening amongst refugee children is needed              | 6                   | 30       | 31                        | 33    | 7                | 1          | 108   | N |
|                                                                                        | 6.5                 | 17.6     | 16.7                      | 31.5  | 25.9             | 1.9        |       | % |
| There is a clear policy for infection screening amongst refugee children               | 20                  | 44       | 15                        | 15    | 9                | 5          | 108   | N |
|                                                                                        | 18.5                | 40.7     | 13.9                      | 13.9  | 8.3              | 4.6        |       | % |
| translation services or tools are available for language barriers                      | 7                   | 19       | 11                        | 51    | 19               | 1          | 108   | N |
|                                                                                        | 21.3                | 32.4     | 13                        | 22.2  | 9.3              | 1.9        |       | % |

|                                                                     |      |      |      |      |      |     |     |   |
|---------------------------------------------------------------------|------|------|------|------|------|-----|-----|---|
| is a part of our daily clinical activities                          | 6    | 30   | 31   | 33   | 7    | 1   | 108 | N |
|                                                                     | 5.6  | 15.7 | 14.8 | 48.1 | 13   | 2.8 |     | % |
| is more difficult because of the complexity of the social situation | 6    | 30   | 31   | 33   | 7    | 1   | 108 | N |
|                                                                     | 5.6  | 15.7 | 14.8 | 48.1 | 13   | 2.8 |     | % |
| is more difficult because of the type of medical problems           | 6    | 30   | 31   | 33   | 7    | 1   | 108 | N |
|                                                                     | 5.6  | 15.7 | 14.8 | 48.1 | 13   | 2.8 |     | % |
| is completely integrated in the routine flow of patient care        | 6    | 30   | 31   | 33   | 7    | 1   | 108 | N |
|                                                                     | 16.7 | 34.3 | 25   | 15.7 | 6.5  | 1.9 |     | % |
| underlying medical problems                                         | 6    | 30   | 31   | 33   | 7    | 1   | 108 | N |
|                                                                     | 1.9  | 15.7 | 21.3 | 52.8 | 7.4  | 0.9 |     | % |
| associated social problems                                          | 6    | 30   | 31   | 33   | 7    | 1   | 108 | N |
|                                                                     | 0.9  | 4.6  | 8.3  | 65.7 | 19.4 | 0.9 |     | % |
| mental health problems                                              | 1    | 8    | 16   | 56   | 22   | 4   | 107 | N |
|                                                                     | 0.9  | 7.5  | 15   | 52.3 | 20.6 | 3.7 |     | % |
| associated sexual health problems                                   | 2    | 15   | 28   | 47   | 12   | 4   | 108 | N |
|                                                                     | 1.9  | 13.9 | 25.9 | 43.5 | 11.1 | 3.7 |     | % |

Appendix table 3.2. Data for Figure 3: Perceived obstacles to providing urgent and emergency care to refugee children and young people in hospitals

|                                                                                      | completely disagree | disagree | neither agree or disagree | agree | completely agree | don't know | total answered |   |
|--------------------------------------------------------------------------------------|---------------------|----------|---------------------------|-------|------------------|------------|----------------|---|
| language barriers                                                                    | 4                   | 28       | 12                        | 47    | 19               |            | 110            | N |
|                                                                                      | 3.6                 | 25.5     | 10.9                      | 42.7  | 17.3             |            |                | % |
| cultural differences influencing health care expectations                            | 6                   | 35       | 18                        | 40    | 9                | 2          | 110            | N |
|                                                                                      | 5.5                 | 31.8     | 16.4                      | 36.4  | 8.2              | 1.8        |                | % |
| funding                                                                              | 27                  | 36       | 19                        | 15    | 7                | 6          | 110            | N |
|                                                                                      | 24.5                | 32.7     | 17.3                      | 13.6  | 6.4              | 5.5        |                | % |
| organising follow-up appointments                                                    | 15                  | 37       | 13                        | 36    | 7                | 2          | 110            | N |
|                                                                                      | 13.6                | 33.6     | 11.8                      | 32.7  | 6.4              | 1.8        |                | % |
| problems with the social situation and safeguarding concerns                         | 15                  | 28       | 15                        | 41    | 9                | 2          | 110            | N |
|                                                                                      | 13.6                | 25.5     | 13.6                      | 37.3  | 8.2              | 1.8        |                | % |
| mental health problems, and inability to deal with these in the emergency department | 7                   | 19       | 24                        | 39    | 16               | 5          | 110            | N |
|                                                                                      | 6.4                 | 17.3     | 21.8                      | 35.5  | 14.5             | 4.5        |                | % |
| the underlying pathology of presenting problems                                      | 18                  | 40       | 24                        | 17    | 6                | 5          | 110            | N |
|                                                                                      | 16.4                | 36.4     | 21.8                      | 15.5  | 5.5              | 4.5        |                | % |
| the severity of illness                                                              | 31                  | 54       | 18                        | 4     | 1                | 2          | 110            | N |
|                                                                                      | 28.2                | 49.1     | 16.4                      | 3.6   | 0.9              | 1.8        |                | % |

|                                                         |      |      |      |      |      |      |     |   |
|---------------------------------------------------------|------|------|------|------|------|------|-----|---|
| rare or drug resistant infectious diseases              | 19   | 46   | 25   | 13   | 1    | 6    | 110 | N |
|                                                         | 17.3 | 41.8 | 22.7 | 11.8 | 0.9  | 5.5  |     | % |
| not knowing previous medical history                    | 7    | 29   | 14   | 45   | 14   | 1    | 110 | N |
|                                                         | 6.4  | 26.4 | 12.7 | 40.9 | 12.7 | 0.9  |     | % |
| giving appropriate safety netting advice*               | 8    | 31   | 13   | 41   | 11   | 6    | 110 | N |
|                                                         | 7.3  | 28.2 | 11.8 | 37.3 | 10   | 5.5  |     | % |
| the prescribing of medications                          | 20   | 38   | 19   | 26   | 6    | 1    | 110 | N |
|                                                         | 18.2 | 34.5 | 17.3 | 23.6 | 5.5  | 0.9  |     | % |
| sexual health problems                                  | 9    | 41   | 25   | 18   | 5    | 12   | 110 | N |
|                                                         | 8.2  | 37.3 | 22.7 | 16.4 | 4.5  | 10.9 |     | % |
| dealing with symptoms of post-traumatic stress disorder | 4    | 19   | 21   | 38   | 19   | 9    | 110 | N |
|                                                         | 3.6  | 17.3 | 19.1 | 34.5 | 17.3 | 8.2  |     | % |

Appendix table 3.3. Data for Figure 4: Presenting signs and symptoms of refugee children and young people to emergency care facilities

| N                               | much less common | less common | just as common | more common | much more common | don't know |
|---------------------------------|------------------|-------------|----------------|-------------|------------------|------------|
| minor injuries and trauma       | 2                | 5           | 38             | 16          | 5                | 26         |
| skin and soft tissue infections | 1                | 1           | 19             | 38          | 9                | 24         |
| vomiting and/or diarrhea        |                  | 1           | 37             | 23          | 7                | 24         |
| dehydration                     | 1                | 3           | 39             | 21          | 4                | 24         |
| fever                           |                  | 2           | 45             | 14          | 6                | 25         |
| headache                        | 2                | 9           | 33             | 16          | 6                | 26         |
| major trauma                    | 6                | 13          | 40             | 5           | 2                | 26         |
| respiratory problems            |                  |             | 47             | 16          | 6                | 22         |
| (any) rash                      | 1                | 2           | 35             | 17          | 10               | 27         |
| allergic reactions              | 3                | 14          | 47             | 1           |                  | 27         |
| mental health problems          | 2                | 5           | 19             | 29          | 10               | 27         |
| safeguarding concerns           | 2                | 4           | 19             | 29          | 10               | 26         |
| ear ache                        | 2                | 4           | 48             | 8           | 3                | 27         |
| abdominal pain                  |                  | 2           | 38             | 23          | 5                | 23         |
| chest pain or hyperventilation  | 2                | 8           | 42             | 10          | 4                | 26         |
| musculoskeletal                 | 2                | 6           | 40             | 16          | 4                | 24         |
| sore throat                     |                  | 2           | 51             | 9           | 3                | 27         |
| weight loss                     | 1                | 3           | 26             | 33          | 6                | 23         |

|                                |   |    |    |    |    |    |
|--------------------------------|---|----|----|----|----|----|
| jaundice                       | 3 | 7  | 39 | 14 |    | 29 |
| general unwell being, lethargy | 2 | 5  | 30 | 27 | 4  | 24 |
| metabolic disorders            | 3 | 8  | 48 | 4  |    | 28 |
| sexual health problems         | 2 | 12 | 32 | 11 | 3  | 31 |
| referral for routine screening | 3 | 9  | 20 | 19 | 10 | 29 |

Metabolic disorders: such as exacerbated Type I DM, including ketoacidosis

Musculoskeletal problems: non traumatic: eg. limp, joint swelling, back pain

Referral for routine screening: referral by other health care professional

| <i>Presenting sign or symptom</i> | N  | Mean score* | standard deviation (SD) | <i>Presenting sign or symptom</i> | median |
|-----------------------------------|----|-------------|-------------------------|-----------------------------------|--------|
| skin and soft tissue infections   | 68 | 3.78        | 0.75                    | minor injuries and trauma         | 3      |
| safeguarding concerns             | 64 | 3.64        | 0.932                   | skin and soft tissue infections   | 4      |
| mental health problems            | 65 | 3.62        | 0.947                   | vomiting and/or diarrhea          | 3      |
| weight loss                       | 69 | 3.58        | 0.775                   | dehydration                       | 3      |
| vomiting and/or diarrhea          | 68 | 3.53        | 0.701                   | fever                             | 3      |
| (any) rash                        | 65 | 3.51        | 0.85                    | headache                          | 3      |
| abdominal pain                    | 68 | 3.46        | 0.679                   | major trauma                      | 3      |
| respiratory problems              | 69 | 3.41        | 0.649                   | respiratory problems              | 3      |
| referral for routine screening    | 61 | 3.39        | 1.084                   | (any) rash                        | 3      |
| general unwell being, lethargy    | 68 | 3.38        | 0.829                   | allergic reactions                | 3      |
| fever                             | 67 | 3.36        | 0.69                    | mental health problems            | 4      |
| dehydration                       | 68 | 3.35        | 0.728                   | safeguarding concerns             | 4      |

|                                |    |      |       |                                |   |
|--------------------------------|----|------|-------|--------------------------------|---|
| minor injuries and trauma      | 66 | 3.26 | 0.829 | ear ache                       | 3 |
| headache                       | 66 | 3.23 | 0.908 | abdominal pain                 | 3 |
| musculoskeletal                | 68 | 3.21 | 0.802 | chest pain or hyperventilation | 3 |
| sore throat                    | 65 | 3.2  | 0.565 | musculoskeletal                | 3 |
| ear ache                       | 65 | 3.09 | 0.701 | sore throat                    | 3 |
| chest pain or hyperventilation | 66 | 3.09 | 0.799 | weight loss                    | 4 |
| sexual health problems         | 60 | 3.02 | 0.854 | jaundice                       | 3 |
| jaundice                       | 63 | 3.02 | 0.729 | general unwell being, lethargy | 3 |
| metabolic disorders            | 63 | 2.84 | 0.601 | metabolic disorders            | 3 |
| major trauma                   | 66 | 2.76 | 0.842 | sexual health problems         | 3 |
| allergic reactions             | 65 | 2.71 | 0.579 | referral for routine screening | 3 |

\*(on 5-points Likert scale)
