# Supplementary material for: Emergency care provided to refugee children in Europe: RefuNET: a cross-sectional survey study
Source: PubMed Central journal article supplement — Emerg Med J. 2020 Sep 9;38(1):5–13. doi: 10.1136/emermed-2019-208699 (PMC7788210; doi:10.1136/emermed-2019-208699), 2020-09-09
Supplement: emermed-2019-208699supp004.pdf [file emermed-2019-208699supp004.pdf]

Appendix 4. Stratified analysis for estimated numbers of refugee children and young people seen in European emergency departments per year

|                                                                                                                                         | High volume <sup>^</sup> | Low volume <sup>^</sup> | p-value |
|-----------------------------------------------------------------------------------------------------------------------------------------|--------------------------|-------------------------|---------|
| <i>Does your hospital provide teaching sessions for physicians on how to manage refugee children in emergency care?</i>                 |                          |                         | 0.03    |
| Yes                                                                                                                                     | 6 (35%)                  | 5 (9%)                  |         |
| No                                                                                                                                      | 11 (65%)                 | 46 (87%)                |         |
| Unknown                                                                                                                                 | 0                        | 2 (4%)                  |         |
| <i>Does your hospital have regular discussions with Public Health or other organisations concerning healthcare of refugee children?</i> |                          |                         | 0.002   |
| Yes                                                                                                                                     | 8 (47%)                  | 5 (9%)                  |         |
| No                                                                                                                                      | 7 (41%)                  | 34 (64%)                |         |
| Unknown                                                                                                                                 | 2 (12%)                  | 14 (26%)                |         |
| <i>Are there any organisations active in your region providing support and healthcare for refugee children?</i>                         |                          |                         | 0.01    |
| Yes                                                                                                                                     | 15 (88%)                 | 26 (49%)                |         |
| No                                                                                                                                      | 0                        | 11 (21%)                |         |
| Unknown                                                                                                                                 | 2 (12%)                  | 16 (30%)                |         |
| <i>Availability of guidelines</i>                                                                                                       |                          |                         |         |
| Immunisations and catch-up immunisation schedule                                                                                        | 8 (47%)                  | 16 (30%)                | 0.12    |
| Infection screening                                                                                                                     | 10 (59%)                 | 14 (26%)                | 0.02    |
| Safeguarding concerns and social care referral                                                                                          | 15 (28%)                 | 5 (29%)                 | 0.79    |
| Mental health issues and symptoms of post-traumatic stress disorder                                                                     | 2 (12%)                  | 6 (11%)                 | 0.91    |
| Managing refugee children in emergency care                                                                                             | 8 (47%)                  | 7 (13%)                 | 0.01    |

<sup>^</sup> high volume >100 refugee children per year seen in the emergency department; low volume ≤ 100 or nil refugee children per year seen in the emergency department; n=22/92 of institutions with unknown numbers of refugee children seen in the emergency department

## Perceived obstacles to providing urgent and emergency care to refugee children and young people in European hospitals

|                                                                           | completely agree/agree (n, %) | neither agree or disagree (n, %) | completely disagree/disagree (n, %) | Dont know (n, %) | completely agree/agree (%) | neither agree or disagree (n, %) | completely disagree/disagree (n, %) | Dont know (n, %) |              |
|---------------------------------------------------------------------------|-------------------------------|----------------------------------|-------------------------------------|------------------|----------------------------|----------------------------------|-------------------------------------|------------------|--------------|
|                                                                           | High volume^                  |                                  |                                     |                  | Low volume^                |                                  |                                     |                  | p-value      |
| <b>language barriers</b>                                                  | 14<br>(82.4%)                 | 1<br>(5.9%)                      | 2<br>(11.8%)                        | 0                | 27<br>(50.9%)              | 6<br>(11.3%)                     | 20<br>(37.7%)                       | 0                | 0.063        |
| <b>not knowing previous medical history</b>                               | 13<br>(76.5%)                 | 3<br>(17.6%)                     | 1<br>(5.9%)                         | 0                | 25<br>(45.3%)              | 4<br>(9.4%)                      | 23<br>(43.4%)                       | 1<br>(1.9%)      | <b>0.007</b> |
| <b>dealing with symptoms of post-traumatic stress syndrome</b>            | 9<br>(52.9%)                  | 4<br>(23.5%)                     | 4<br>(23.5%)                        | 0                | 27<br>(50.9%)              | 9<br>(17%)                       | 13<br>(24.5%)                       | 4<br>(7.5%)      | 0.26         |
| <b>mental health problems, and inability to deal with these in the ED</b> | 12<br>(70.6%)                 | 3<br>(17.6%)                     | 2<br>(11.8%)                        | 0                | 23<br>(43.4%)              | 11<br>(20.8%)                    | 16<br>(30.2%)                       | 3<br>(5.7%)      | 0.4          |
| <b>giving appropriate safety netting advice</b>                           | 5<br>(47.1%)                  | 2<br>(11.8%)                     | 5<br>(29.4%)                        | 2<br>(11.8%)     | 23<br>(43.4%)              | 7<br>(13.2%)                     | 19<br>(35.8%)                       | 4<br>(7.5%)      | 0.45         |
| <b>problems with the social situation and safeguarding concerns</b>       | 7<br>(41.2%)                  | 2<br>(11.8%)                     | 8<br>(47.1%)                        | 0                | 21<br>(39.6%)              | 7<br>(13.2%)                     | 24<br>(45.3%)                       | 1<br>(1.9%)      | 0.83         |
| <b>cultural differences influencing health care expectations</b>          | 12<br>(70.6%)                 | 2<br>(11.8%)                     | 3<br>(17.6%)                        | 0                | 18<br>(34%)                | 10<br>(18.9%)                    | 23<br>(43.4%)                       | 2<br>(3.8%)      | 0.1          |
| <b>organising follow-up appointments</b>                                  | 7<br>(41.2%)                  | 1<br>(5.9%)                      | 9<br>(52.9%)                        | 0                | 16<br>(30.2%)              | 7<br>(13.2%)                     | 29<br>(54.7%)                       | 1<br>(1.9%)      | 0.75         |
| <b>the prescribing of medications</b>                                     | 6<br>(35.3%)                  | 3<br>(17.6%)                     | 8<br>(47.1%)                        | 0                | 13<br>(24.5%)              | 7<br>(13.2%)                     | 32<br>(60.4%)                       | 1<br>(1.9%)      | 0.48         |
| <b>the underlying pathology of presenting problems</b>                    | 4<br>(23.5%)                  | 5<br>(29.4%)                     | 8<br>(47.1%)                        | 0                | 9<br>(17.0%)               | 10<br>(18.9%)                    | 31<br>(58.5%)                       | 3<br>(5.7%)      | 0.75         |

|                                                   |              |              |               |             |               |               |               |             |      |
|---------------------------------------------------|--------------|--------------|---------------|-------------|---------------|---------------|---------------|-------------|------|
| <b>sexual health problems</b>                     | 5<br>(29.4%) | 4<br>(23.5%) | 7<br>(41.2%)  | 1<br>(5.9%) | 8<br>(15.1%)  | 12<br>(22.6%) | 28<br>(52.8%) | 5<br>(9.4%) | 0.07 |
| <b>funding</b>                                    | 3<br>(17.6%) | 2<br>(11.8%) | 11<br>(64.7%) | 1<br>(5.9%) | 10<br>(18.9%) | 8<br>(15.1%)  | 33<br>(62.3%) | 2<br>(3.8%) | 0.96 |
| <b>rare or drug resistant infectious diseases</b> | 3<br>(17.6%) | 3<br>(17.6%) | 11<br>(64.7%) | 0           | 7<br>(13.2%)  | 11<br>(20.8%) | 30<br>(56.6%) | 5<br>(9.4%) | 0.17 |
| <b>the severity of illness</b>                    | 0            | 5<br>(29.4%) | 12<br>(70.6%) | 0           | 0             | 10<br>(18.9%) | 41<br>(77.4%) | 2<br>(3.8%) | 0.65 |

^ high volume >100 refugee children per year seen in the emergency department; low volume <= 100 or nil refugee children per year seen in the emergency department

## Statements on needs for providing urgent and emergency care to refugee children and young people in European hospitals

| Statements                                                                                    | High volume <sup>^</sup>      |                                  |                                     |                  | Low volume <sup>^</sup>       |                                  |                                     |                  | p-value          |
|-----------------------------------------------------------------------------------------------|-------------------------------|----------------------------------|-------------------------------------|------------------|-------------------------------|----------------------------------|-------------------------------------|------------------|------------------|
|                                                                                               | completely agree/agree (n, %) | neither agree or disagree (n, %) | completely disagree/disagree (n, %) | Dont know (n, %) | completely agree/agree (n, %) | neither agree or disagree (n, %) | completely disagree/disagree (n, %) | Dont know (n, %) |                  |
| <b><i>In our emergency care facilities:</i></b>                                               |                               |                                  |                                     |                  |                               |                                  |                                     |                  |                  |
| <b>we are well prepared for dealing with refugee children with acute health care problems</b> | 8<br>(47.1%)                  | 7<br>(41.2%)                     | 2<br>(11.8%)                        | 0                | 16<br>(30.2%)                 | 16<br>(30.2%)                    | 20<br>(37.8%)                       | 1<br>(1.9%)      | 0.41             |
| <b>there is clear guidance on dealing with refugee children</b>                               | 7<br>(41.2%)                  | 3<br>(17.6%)                     | 7<br>(41.2%)                        | 0                | 5<br>(9.4%)                   | 6<br>(11.3%)                     | 41<br>(77.4%)                       | 1<br>(1.9%)      | <b>0.04</b>      |
| <b>there is a need for a clinical guideline for dealing with refugee children</b>             | 11<br>(64.7%)                 | 3<br>(17.6%)                     | 3<br>(17.6%)                        | 0                | 31<br>(58.5%)                 | 17<br>(32.1%)                    | 5<br>(9.4%)                         | 0                | 0.43             |
| <b>there is a clear policy for infection screening amongst refugee children</b>               | 9<br>(52.9%)                  | 2<br>(11.8%)                     | 6<br>(35.3%)                        | 0                | 6<br>(11.3%)                  | 7<br>(13.2%)                     | 35<br>(66%)                         | 5<br>(9.4%)      | <b>0.01</b>      |
| <b>a clear policy for infection screening amongst refugee children is needed</b>              | 7<br>(41.2%)                  | 5<br>(29.4%)                     | 5<br>(29.4%)                        | 0                | 29<br>(54.7%)                 | 12<br>(22.6%)                    | 10<br>(18.9%)                       | 2<br>(3.8%)      | 0.33             |
| <b>translation services or tools are available for language barriers</b>                      | 10<br>(58.8%)                 | 2<br>(11.8%)                     | 5<br>(29.4%)                        | 0                | 31<br>(58.5%)                 | 5<br>(9.4%)                      | 16<br>(30.2%)                       | 1<br>(1.9%)      | 0.99             |
| <b><i>In paediatric emergency care dealing with refugee children:</i></b>                     |                               |                                  |                                     |                  |                               |                                  |                                     |                  |                  |
| <b>is a part of our daily clinical activities</b>                                             | 13<br>(76.5%)                 | 2<br>(11.8%)                     | 2<br>(11.8%)                        | 0                | 9<br>(17.0%)                  | 5<br>(9.4%)                      | 38<br>(71.7%)                       | 1<br>(1.9%)      | <b>&lt;0.001</b> |
| <b>is more difficult because of the type of medical problems</b>                              | 5<br>(29.4%)                  | 5<br>(29.4%)                     | 7<br>(41.2%)                        | 0                | 10<br>(18.9%)                 | 17<br>(32.1%)                    | 23<br>(43.4%)                       | 3<br>(5.7%)      | 0.06             |
| <b>is completely integrated in the routine flow of patient care</b>                           | 8<br>(47.1%)                  | 3<br>(17.6%)                     | 5<br>(29.4%)                        | 1<br>(5.9%)      | 10<br>(18.9%)                 | 10<br>(18.9%)                    | 32<br>(60.4%)                       | 1<br>(1.9%)      | 0.10             |
| <b>is more difficult because of the complexity of the social situation</b>                    | 12<br>(70.6%)                 | 4<br>(23.5%)                     | 1<br>(5.9%)                         | 0                | 28<br>(52.8%)                 | 5<br>(9.4%)                      | 17<br>(32.1%)                       | 3<br>(5.7%)      | 0.07             |
| <b><i>Specific training for better refugee care is needed because of:</i></b>                 |                               |                                  |                                     |                  |                               |                                  |                                     |                  |                  |

|                                          |               |              |              |             |               |               |              |             |      |
|------------------------------------------|---------------|--------------|--------------|-------------|---------------|---------------|--------------|-------------|------|
| <b>associated social problems</b>        | 16<br>(94.1%) | 1<br>(5.9%)  | 0            | 0           | 40<br>(75.5%) | 7<br>(13.2%)  | 5<br>(9.4%)  | 1<br>(1.9%) | 0.65 |
| <b>mental health problems</b>            | 12<br>(70.6%) | 2<br>(11.8%) | 2<br>(11.8%) | 1<br>(5.9%) | 38<br>(71.7%) | 9<br>(17.0%)  | 4<br>(7.5%)  | 2<br>(3.8%) | 0.91 |
| <b>underlying medical problems</b>       | 10<br>(58.8%) | 3<br>(17.6%) | 4<br>(23.5%) | 0           | 32<br>(60.4%) | 12<br>(22.6%) | 8<br>(15.1%) | 1<br>(1.9%) | 0.41 |
| <b>associated sexual health problems</b> | 10<br>(58.8%) | 1<br>(5.9%)  | 5<br>(29.4%) | 1<br>(5.9%) | 26<br>(49.1%) | 16<br>(30.2%) | 9<br>(17.0%) | 2<br>(3.8%) | 0.28 |

^ high volume >100 refugee children per year seen in the emergency department; low volume <= 100 or nil refugee children per year seen in the emergency department
